# Supplementary material for: Comparative Evaluation of the Antimicrobial and Mucus Induction Properties of Selected Bacillus Strains against Enterotoxigenic Escherichia coli
Source: MDPI journal article supplement (doi:10.3390/antibiotics9120849), 2020-11-27
Supplement: s1 [file s1]

# Comparative Evaluation of the Antimicrobial and Mucus Induction Properties of Selected *Bacillus* Strains Against Enterotoxigenic *Escherichia coli*

Natalia Bravo Santano <sup>1</sup>, Erik Juncker Boll <sup>2</sup>, Lena Catrine Capern <sup>2</sup>, Tomasz Maciej Cieplak <sup>2</sup>, Enver Keleszade <sup>1</sup>, Michal Letek <sup>3,†</sup> and Adele Costabile <sup>1,\*,†</sup>

<sup>1</sup> Department of Life Sciences, University of Roehampton, London, UK;

nbravasantano@gmail.com (N.B.S.); keleszae@roehampton.ac.uk (E.K.)

<sup>2</sup> Animal Health Innovation, Chr. Hansen A/S, Hørsholm, Denmark; dkerbo@chr-hansen.com (E.J.B.);

dkleca@chr-hansen.com (L.C.C.); dktoci@chr-hansen.com (T.M.C.)

<sup>3</sup> Departamento de Biología Molecular, Facultad de Ciencias Biológicas y Ambientales, Universidad de León, León, Spain; michal.letek@unileon.es

\* Correspondence: adele.costabile@roehampton.ac.uk, Tel.: +44-(0)-20-8392-3571

† These authors share co-senior authorship.

Received: 8 November 2020; Accepted: 25 November 2020; Published: date

## Supplementary materials

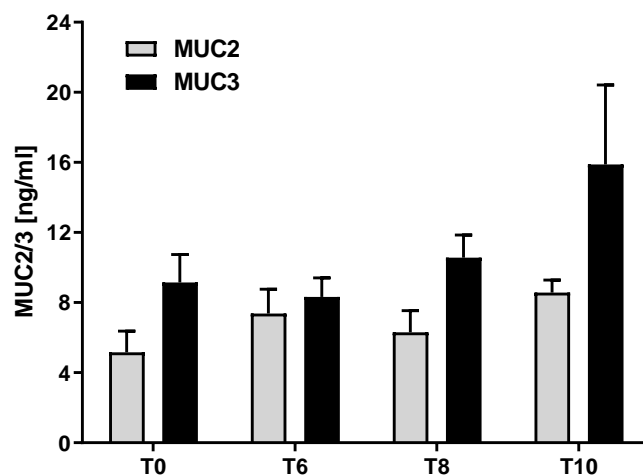

**Figure S1.** Quantification of MUC2 and MUC3 in HT29-16E cells after treatment with *Bacillus subtilis* strain CHCC 15541. HT29-16E cells were incubated with CHCC 15541 for 6, 8, and 10 hours, and concentrations of both mucin 2 (MUC2) and mucin 3 (MUC3) were quantified by ELISA at these time points. Data are expressed as Mean  $\pm$  SEM of one experiment performed in duplicates.
